# Supplementary material
Source: PubMed Central journal article supplement (PMC7965168)
Supplement: 4013.table.pdf [file 4013.table.pdf]

**On-line Table: Demographic variables, aneurysm characteristics, PED size, and flow modification results**

| Patient | Age (y) | Sex (M/F) | Location                    | Size of Aneurysm (mm) | Size of PED (Diameter × Length, mm) | Length of PED Over MI Segment (mm) | Immediate Result— Flow in Ipsilateral A1 segment | FU MRA Result— Regression of Ipsilateral A1 Segment | FU DSA Result— Flow in Ipsilateral A1 Segment |
|---------|---------|-----------|-----------------------------|-----------------------|-------------------------------------|------------------------------------|--------------------------------------------------|-----------------------------------------------------|-----------------------------------------------|
| 1       | 47      | F         | PcomA                       | 21 × 19               | 3.25 × 18; 3.5 × 16                 | 16.3                               | NC                                               | Yes                                                 | CRF                                           |
| 2       | 62      | F         | PcomA                       | 12 × 6                | 3.75 × 20                           | 0.97                               | NC                                               | NA                                                  | NC                                            |
| 3       | 71      | M         | AchoA; 2XICAb               | 2.5; 2.5 × 1.5; 1.5   | 3.5 × 18                            | 5.72                               | NC                                               | NA                                                  | CRF                                           |
| 4       | 67      | F         | Superior hypophyseal; AchoA | 7 × 4.5; 2            | 3 × 20; 3.25 × 14                   | 5.96                               | NC                                               | Yes                                                 | CRF                                           |
| 5       | 72      | F         | AchoA                       | 7 × 4.5               | 3.25 × 18                           | 6.52                               | NC                                               | Yes                                                 | CRF                                           |
| 6       | 39      | F         | ICAb; A1 segment; AchoA     | 8.5 × 8; 2; 2         | 3.25 × 16                           | 6.33                               | AFR                                              | Yes                                                 | NA                                            |
| 7       | 35      | M         | PcomA; ICAb                 | 4.5 × 2.5; 5 × 3      | 3 × 18                              | 4.95                               | NC                                               | Yes                                                 | NA                                            |

**Note:**— AFR indicates antegrade flow retardation; CRF, complete reversal of flow; FU, follow-up; NA, not available; NC, no change; PcomA, posterior communicating artery; 2XICAb, internal carotid artery bifurcation.
